# Supplementary material
Source: publisher site journal article supplement (https://www.dovepress.com/article/378867)
Supplement: Supplementary file 1 [file get_supplementary_file.php]

**Supplementary appendix**

**Supplementary Table 1** Patient characteristics

| **Patient characteristic** | **Data collected** |
| --- | --- |
| **Demographics** | |
| Index year | Year of subject’s index date |
| Age | Age as of the index year |
| Age group | Age as of the index year, categorized to: 40–49, 50–59, 60–64, 65–69, 70–74, 75+ |
| Gender | Male or female |
| Insurance type | Commercial or Medicare Advantage health plan |
| Plan type | Exclusive Provider Organization, Health Maintenance Organization, Point of Service, Preferred Provider Organization, Individual or Other |
| Geographic region | Northeast, Midwest, South, West, or Other |
| **Clinical characteristics** | |
| COPD severity score | A claims-based measure of COPD severity in the baseline period was determined based on medical and pharmacy claims. This score was based on the sum of 12 weighted claims-based components and bounded by zero, with no upper limit |
| Quan-Charlson comorbidity score | A comorbidity score was calculated based on the presence of diagnosis codes on medical claims in the pre-index period. The Quan-Charlson comorbidity score was also categorized into the following groups: 0, 1–2, 3–4, and ≥5 |
| Comorbid conditions | General comorbid conditions were defined using the Clinical Classifications Software managed by the Agency for Healthcare Research and Quality. This measure generated indicator variables for specific disease conditions based on ICD‑10 diagnoses |
| Medications | Count of unique medications filled in the baseline period |
| Respiratory medications | Indicator variables for respiratory medication classes, including guideline-recommended antibiotics, and selected individual respiratory medications were created. The number of fills and days supply by class (or individual medication) were captured. This measure included all non-index medications filled on the index date (ie index medication fills were excluded) |
| COPD treatment ratio | As a measure of exacerbation risk, the ratio of controller medications to all COPD medications (controller + rescue) was calculated. This measure included all non-index medications filled on the index date (ie index medication fills were excluded) |

**Abbreviations:** COPD, chronic obstructive pulmonary disease; ICD, International Classification of Diseases.

**Supplementary Table 2** All-cause HCRU in the follow-up versus baseline period

|  | **Baseline (N=912)** | **Follow-up (N=912)** | **p-value** |
| --- | --- | --- | --- |
| **Ambulatory visit** | | | |
| Utilization, n (%) | 911 (99.9) | 912 (100.0) | - |
| Count, mean (SD) | 28.8 (23.9) | 31.2 (29.7) | 0.999 |
| **Office visit** | | | |
| Utilization, n (%) | 902 (98.9) | 900 (98.7) | 0.282 |
| Count, mean (SD) | 16.7 (13.4) | 16.2 (12.6) | 0.075 |
| **Outpatient visit** | | | |
| Utilization, n (%) | 777 (85.2) | 769 (84.3) | 0.266 |
| Count, mean (SD) | 12.1 (17.3) | 15.1 (24.6) | 0.999 |
| **ER visit** | | | |
| Utilization, n (%) | 422 (46.3) | 450 (49.3) | 0.938 |
| Count, mean (SD) | 1.4 (5.5) | 1.6 (5.4) | 0.992 |
| **Inpatient stay** | | | |
| Utilization, n (%) | 283 (31.0) | 287 (31.5) | 0.590 |
| Count, mean (SD) | 0.5 (0.9) | 0.5 (1.0) | 0.805 |
| Inpatient days, mean (SD) | 3.7 (11.2) | 4.4 (11.6) | 0.899 |
| **Pharmacy use** | | | |
| Utilization, n (%) | 912 (100.0) | 909 (99.7) | - |
| Count, mean (SD) | 65.5 (41.8) | 60.2 (39.7) | <0.001 |

**Note:** Paired t-test, one-tailed, was used for continuous measures.

**Abbreviations:** ER, emergency visit; HCRU, health care resource utilization; SD, standard deviation.

**Supplementary Table 3** COPD-related HCRU in the follow-up versus baseline period

|  | **Baseline (N=912)** | **Follow-up (N=912)** | **p-value** |
| --- | --- | --- | --- |
| **Ambulatory visit** | | | |
| Utilization, n (%) | 827 (90.7) | 781 (85.6) | <0.001 |
| Count, mean (SD) | 6.1 (8.9) | 6.6 (13.6) | 0.860 |
| **Office visit** | | | |
| Utilization, n (%) | 776 (85.1) | 729 (79.9) | <0.001 |
| Count, mean (SD) | 3.1 (2.8) | 2.7 (2.7) | <0.001 |
| **Outpatient visit** | | | |
| Utilization, n (%) | 382 (41.9) | 371 (40.7) | 0.267 |
| Count, mean (SD) | 3.0 (8.1) | 3.9 (13.0) | 0.979 |
| **ER visit** | | | |
| Utilization, n (%) | 182 (20.0) | 159 (17.4) | 0.059 |
| Count, mean (SD) | 0.4 (1.1) | 0.3 (1.1) | 0.186 |
| **Inpatient stay** | | | |
| Utilization, n (%) | 187 (20.5) | 178 (19.5) | 0.279 |
| Count, mean (SD) | 0.3 (0.7) | 0.3 (0.7) | 0.358 |
| Inpatient days, mean (SD) | 2.6 (10.1) | 3.0 (10.2) | 0.785 |
| **Pharmacy use** | | | |
| Utilization, n (%) | 912 (100.0) | 904 (99.1) | - |
| Count, mean (SD) | 23.0 (11.8) | 17.8 (11.5) | <0.001 |

**Note:** Paired t-test, one-tailed, was used for continuous measures.

**Abbreviations:** ER, emergency room; SD, standard deviation.

**Supplementary Table 4** All-cause HCRU total costs ($) in the follow-up versus baseline period

|  |  | **Baseline (N=912)** | **Follow-up (N=912)** | **p-value** |
| --- | --- | --- | --- | --- |
| Total (medical + pharmacy costs) | Mean | 27,236.11 | 30,033.25 | 0.958 |
| SD | 29,364.71 | 50,995.52 |  |
| p25 | 10,642.12 | 9,436.58 |  |
| Median | 17,154.10 | 16,947.11 |  |
| p75 | 31,401.08 | 33,811.11 |  |
| Medical costs | Mean | 14,962.00 | 18,623.01 | 0.990 |
| SD | 23,843.88 | 47,025.55 |  |
| p25 | 2,868.23 | 2,828.06 |  |
| Median | 6,408.15 | 6,413.20 |  |
| p75 | 17,883.32 | 19,548.34 |  |
| Ambulatory | Mean | 6,050.59 | 7,222.27 | 0.998 |
| SD | 11,030.76 | 14,413.60 |  |
| p25 | 1,579.84 | 1,636.74 |  |
| Median | 3,270.97 | 3,305.18 |  |
| p75 | 6,756.46 | 7,322.05 |  |
| Office visits | Mean | 2,541.29 | 2,903.68 | 0.944 |
| SD | 3,917.89 | 7,837.17 |  |
| p25 | 937.50 | 794.14 |  |
| Median | 1,593.31 | 1,535.51 |  |
| p75 | 2,757.12 | 2,775.30 |  |
| Outpatient visits | Mean | 3,509.30 | 4,318.59 | 0.993 |
| SD | 9,629.31 | 11,049.55 |  |
| p25 | 201.34 | 212.76 |  |
| Median | 1,114.40 | 1,237.33 |  |
| p75 | 3,781.62 | 4,044.66 |  |
| ER visits | Mean | 1,060.15 | 1,153.50 | 0.874 |
| SD | 3,584.91 | 3,478.54 |  |
| p25 | 0.00 | 0.00 |  |
| Median | 0.00 | 0.00 |  |
| p75 | 946.87 | 1,096.58 |  |
| Inpatient stays | Mean | 6,289.73 | 8,290.28 | 0.923 |
| SD | 16,697.71 | 39,863.85 |  |
| p25 | 0.00 | 0.00 |  |
| Median | 0.00 | 0.00 |  |
| p75 | 6,384.81 | 7,755.70 |  |
| Other medical costs | Mean | 1,561.52 | 1,956.95 | 0.938 |
| SD | 5,394.55 | 9,111.63 |  |
| p25 | 159.27 | 207.44 |  |
| Median | 913.14 | 1,046.31 |  |
| p75 | 1,639.44 | 1,692.20 |  |
| Pharmacy costs | Mean | 12,274.11 | 11,410.24 | 0.005 |
| SD | 15,478.74 | 16,142.12 |  |
| p25 | 5,981.72 | 5,164.52 |  |
| Median | 8,409.16 | 7,207.97 |  |
| p75 | 12,293.52 | 11,431.69 |  |

**Note:** Paired t-test, one-tailed, was used for continuous measures.

**Abbreviations:** ER, emergency room; HCRU, health care resource utilization; SD, standard deviation.

**Supplementary Table 5** COPD-related HCRU total costs ($) in the baseline versus follow-up period

|  |  | **Baseline (N=912)** | **Follow-up (N=912)** | **p-value** |
| --- | --- | --- | --- | --- |
| Total (medical + pharmacy costs) | Mean | 11,955.26 | 11,803.13 | 0.440 |
| SD | 12,442.47 | 29,221.90 |  |
| p25 | 6,082.80 | 4,898.68 |  |
| Median | 8,245.89 | 6,912.12 |  |
| p75 | 12,477.08 | 11,073.01 |  |
| Medical costs | Mean | 5,251.31 | 6,264.53 | 0.844 |
| SD | 12,083.39 | 29,053.00 |  |
| p25 | 322.12 | 238.83 |  |
| Median | 1,218.27 | 1,110.22 |  |
| p75 | 3,001.78 | 2,742.72 |  |
| Ambulatory | Mean | 814.15 | 784.56 | 0.333 |
| SD | 1,513.87 | 1,725.09 |  |
| p25 | 190.56 | 115.53 |  |
| Median | 396.79 | 319.13 |  |
| p75 | 779.02 | 705.04 |  |
| Office visits | Mean | 361.59 | 289.90 | <0.001 |
| SD | 358.01 | 317.05 |  |
| p25 | 109.50 | 71.99 |  |
| Median | 279.59 | 213.07 |  |
| p75 | 520.53 | 420.13 |  |
| Outpatient visits | Mean | 452.56 | 494.66 | 0.739 |
| SD | 1,406.84 | 1,642.32 |  |
| p25 | 0.00 | 0.00 |  |
| Median | 0.00 | 0.00 |  |
| p75 | 225.85 | 219.15 |  |
| ER visits | Mean | 195.05 | 140.71 | 0.019 |
| SD | 771.90 | 563.10 |  |
| p25 | 0.00 | 0.00 |  |
| Median | 0.00 | 0.00 |  |
| p75 | 0.00 | 0.00 |  |
| Inpatient stays | Mean | 3,712.50 | 4,745.15 | 0.851 |
| SD | 11,285.88 | 28,616.58 |  |
| p25 | 0.00 | 0.00 |  |
| Median | 0.00 | 0.00 |  |
| p75 | 0.00 | 0.00 |  |
| Other medical costs | Mean | 529.61 | 594.12 | 0.998 |
| SD | 752.39 | 886.95 |  |
| p25 | 0.00 | 0.00 |  |
| Median | 64.33 | 91.43 |  |
| p75 | 1,082.88 | 1,135.10 |  |
| Pharmacy costs | Mean | 6,703.94 | 5,538.59 | <0.001 |
| SD | 2,982.06 | 2,872.92 |  |
| p25 | 4,721.00 | 3,932.29 |  |
| Median | 6,253.44 | 5,033.25 |  |
| p75 | 8,489.67 | 6,927.32 |  |

**Note:** Paired t-test, one-tailed, was used for continuous measures.

**Abbreviations:** COPD, chronic obstructive pulmonary disease; ER, emergency room; HCRU, health care resource utilization; SD, standard deviation.

**Supplementary Figure 1** Study design

**Index date:
First date with FF/UMEC/VI**

**Pre-index period:**

12 months

**Post-index period:**

12 months

**Identification period start:**

Sep 1, 2017

**Identification
period end:**

Dec 31, 2018

**Study design**
